# Supplementary material
Source: publisher figshare collection journal article supplement (https://sage.figshare.com/ndownloader/files/13836140)
Supplement: Supplementary file 1 [file 13836140]

Figure S1

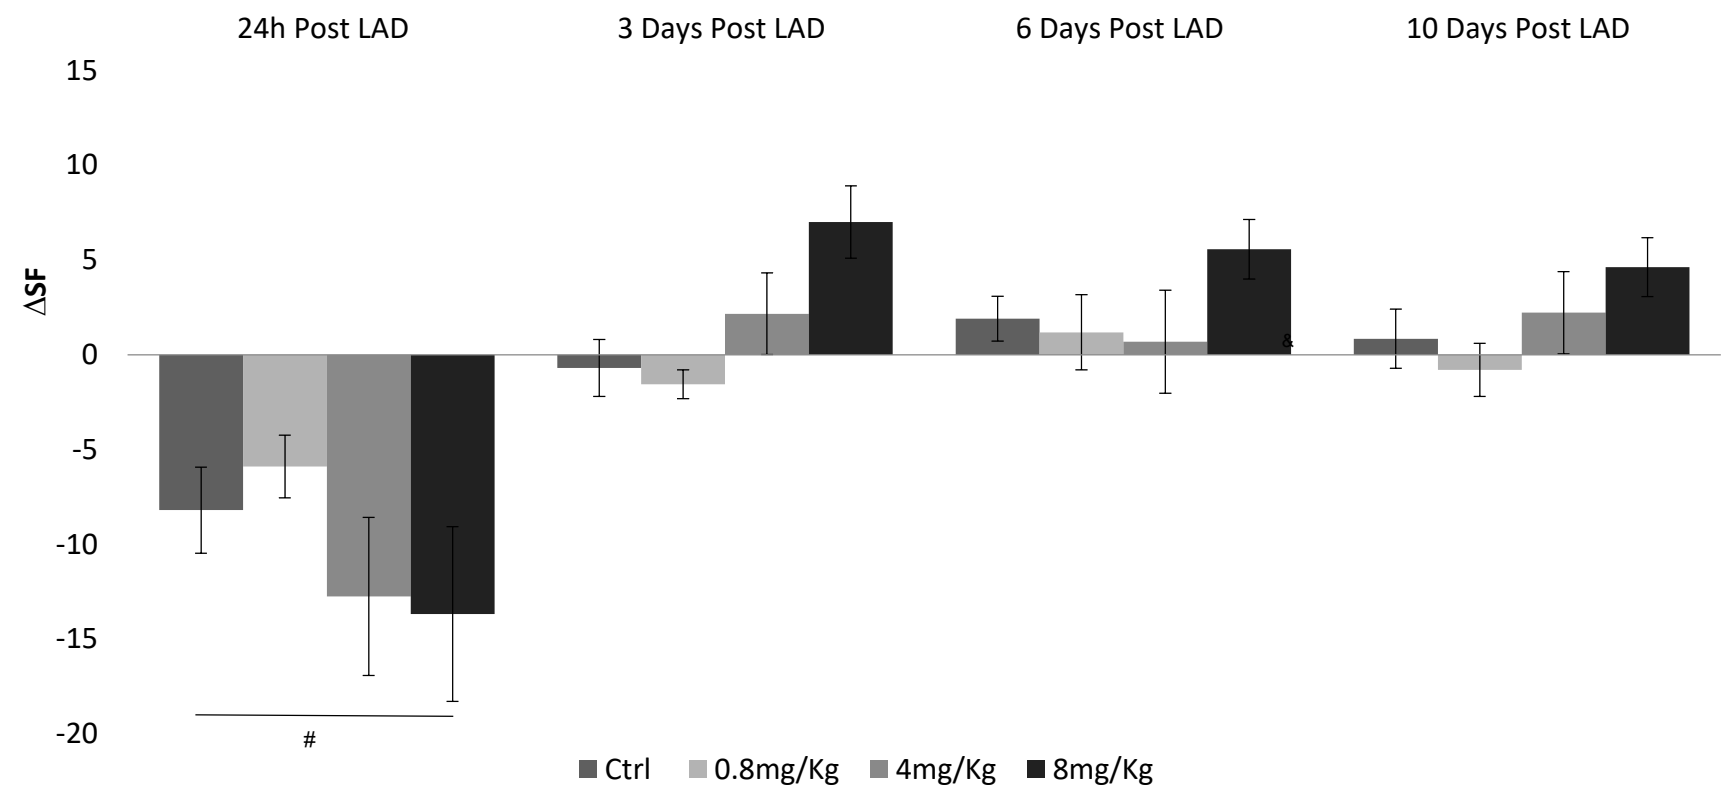

**Figure S1.** *Effect of ouabain on force of contraction (fractional shortening) following MI in rats*

LAD-ligation was performed in male Wistar rats as described in Materials and Methods. The control group (Ctrl) received an i.p. injection of saline ( $0.5\text{ml kg}^{-1}\text{ day}^{-1}$ ). 0.8, 4 and 8 mg/kg/day ouabain were injected every 24 hrs. Heart contractility *in-vivo* was monitored with echocardiography at baseline, 24 hrs. and 3, 6 and 10 days post MI. The difference between the fractional shortening ( $\Delta\text{FS}$ ) post MI during tested time period at each experimental condition are depicted. Results are expressed as Means  $\pm$  SEM from 6 animals for each experimental group. #Significantly lower than baseline ( $P<0.05$ ).

Figure S2

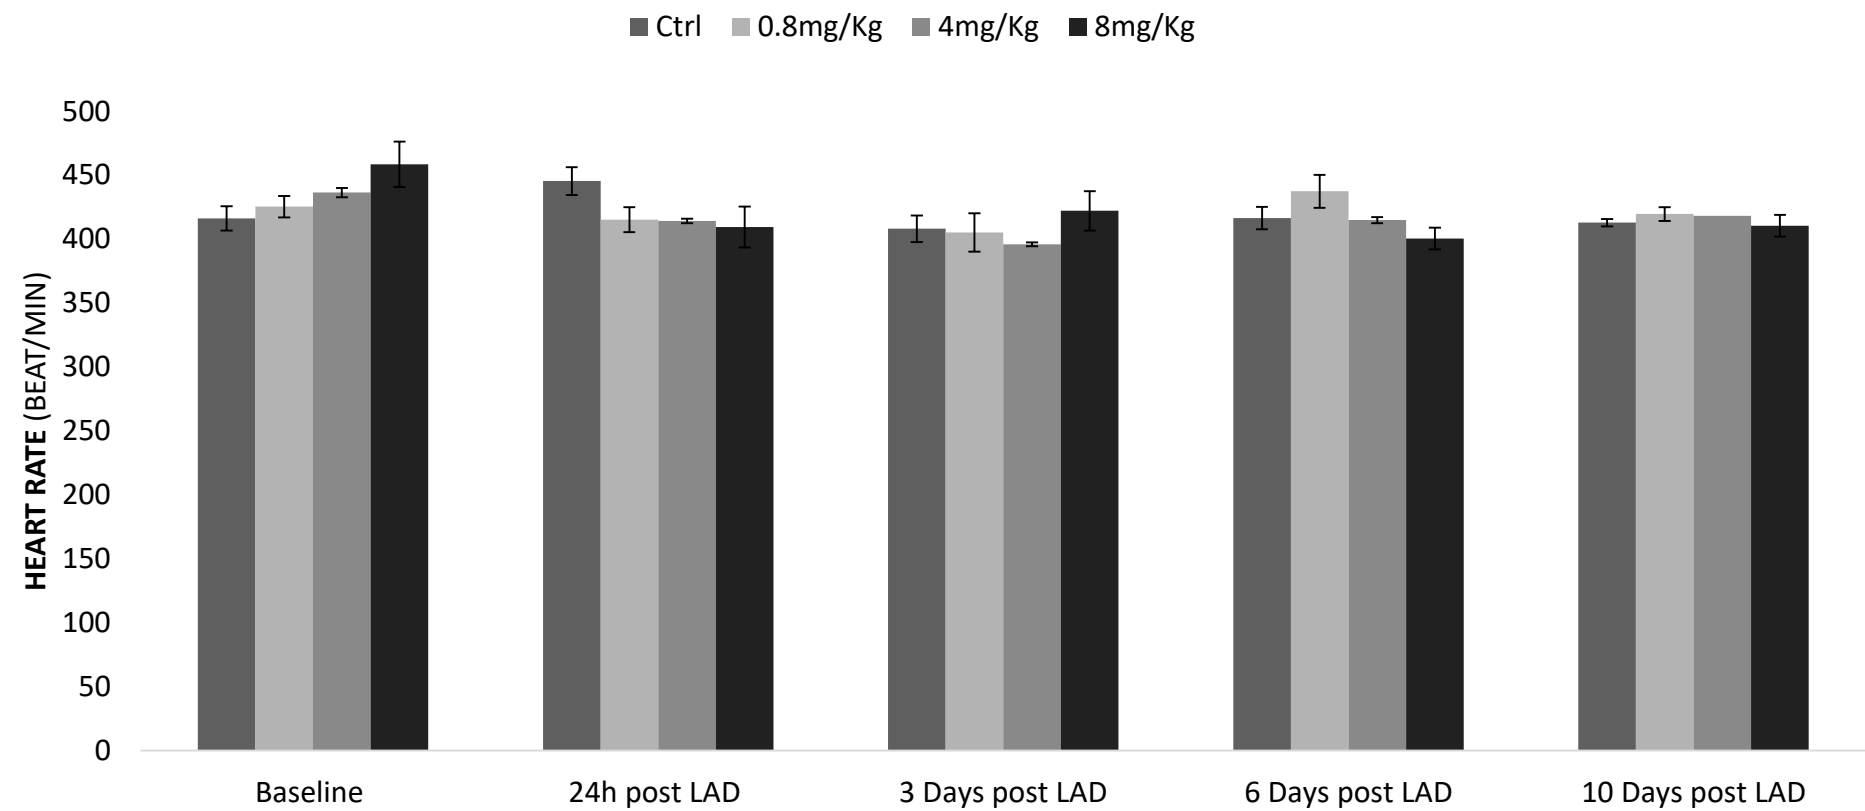

**Figure S2.** *Effect of ouabain on heart rate following MI in rats*

LAD-ligation was performed in male Wistar rats as described in Materials and Methods. The control group (Ctrl) received an i.p. injection of saline ( $0.5\text{ml kg}^{-1}\text{ day}^{-1}$ ). 0.8, 4 and 8 mg/kg/day ouabain were injected every 24 hrs. Heart rate was monitored with echocardiography at baseline, 24 hrs. and 3, 6 and 10 days post MI. Results are expressed as Means  $\pm$  SEM from 6 animals for each experimental group.

Figure S3

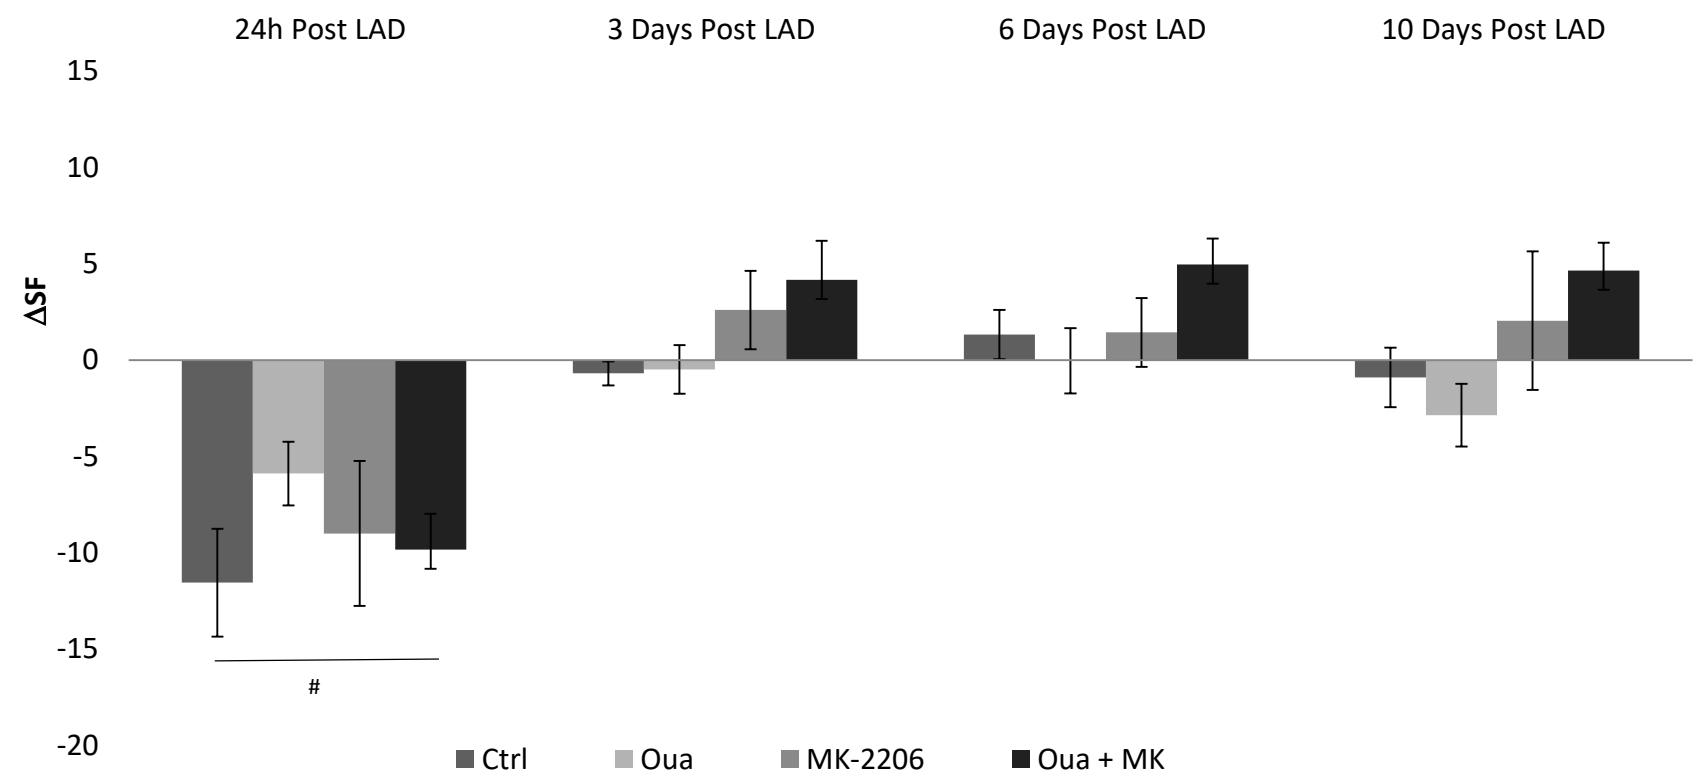

**Figure S3.** *Effect of a combination of MK-2206 and ouabain on force of contraction (fractional shortening) following MI in rats*

LAD-ligation was performed in male Wistar rats, as described in Materials and Methods. The control group (Ctrl) received an i.p. injection of saline ( $0.5\text{ ml kg}^{-1}\text{ day}^{-1}$ ), ouabain ( $0.8\text{--}8\text{ mg kg}^{-1}\text{ day}^{-1}$ ), MK-2206 ( $12\text{ mg Kg}^{-1}\text{ day}^{-1}$ , MK-2206) or a combination of MK-2206 and ouabain (Oua + MK).

Echocardiography was used to monitor heart contractility *in-vivo*. Differences between the fractional shortening before LAD-ligation and the experimental conditions ( $\Delta\text{FS}$ ) are depicted.

Results are expressed as Means  $\pm$  SEM from 2 independent experiments of 5-7 animals in each.

#Significantly lower than baseline level ( $P < 0.05$ ).

Figure S4

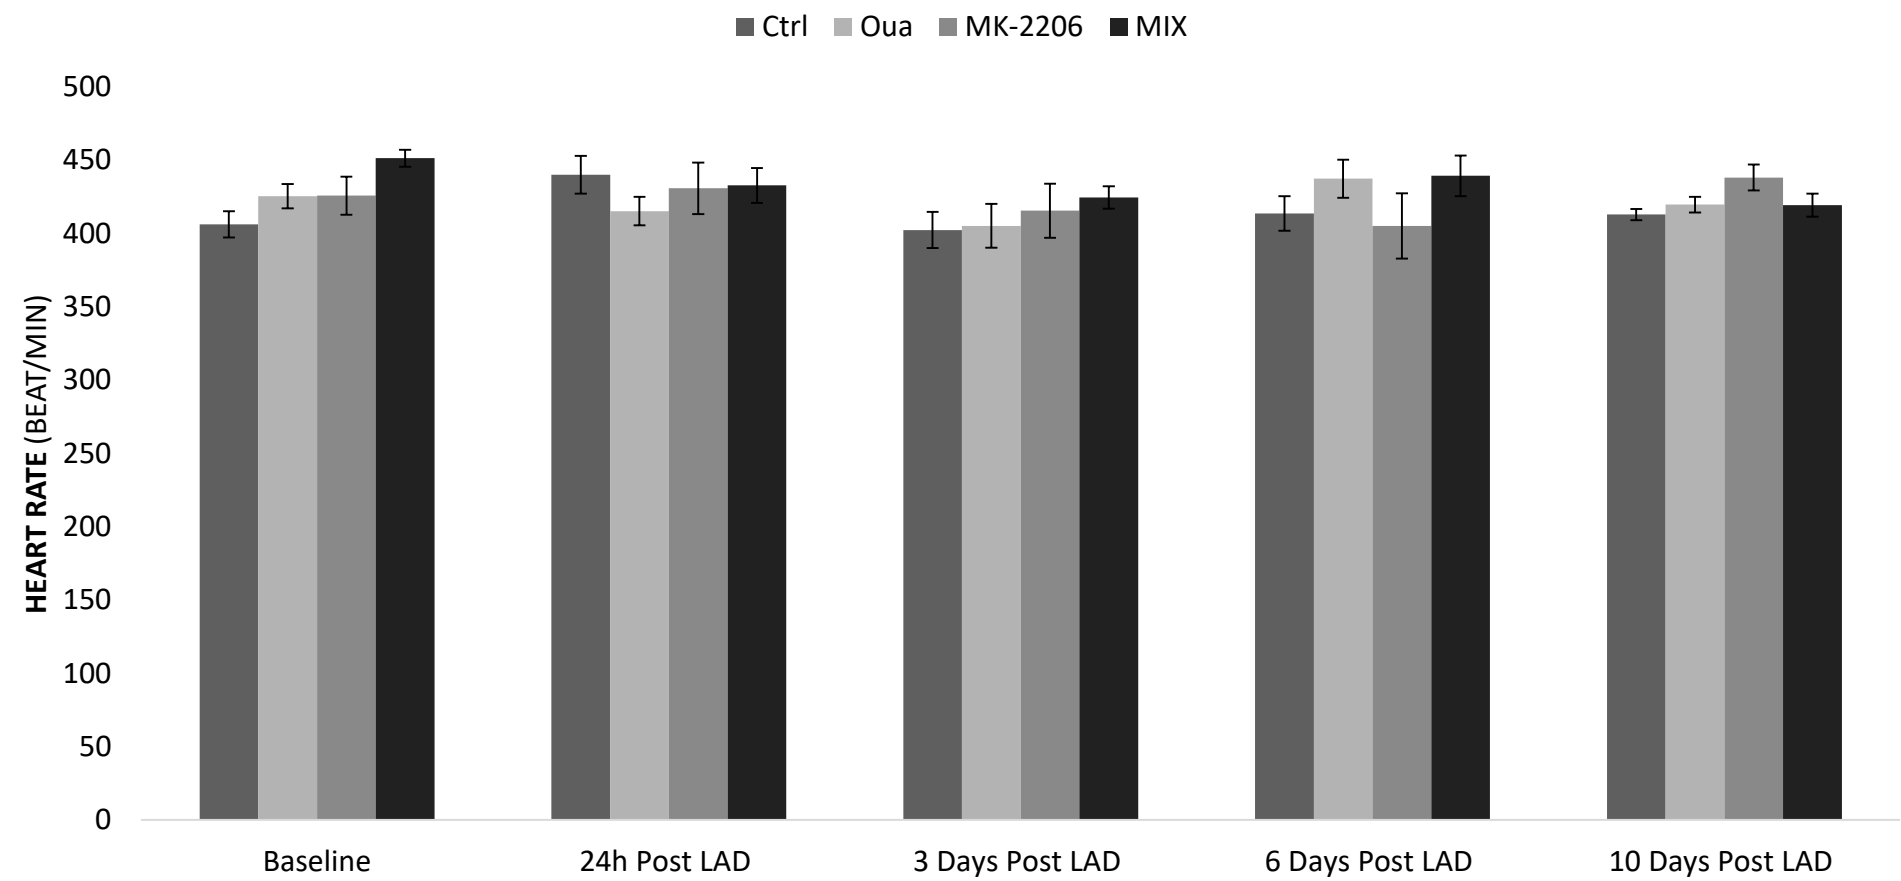

**Figure S4.** *Effect of a combination of MK-2206 and ouabain on heart rate following MI in rats*

LAD-ligation was performed in male Wistar rats as described in Materials and Methods. The control group (Ctrl) received an i.p. injection of saline ( $0.5\text{ml kg}^{-1}\text{ day}^{-1}$ ), ouabain ( $0.8\text{-}8\text{ mg kg}^{-1}\text{ day}^{-1}$ ), MK-2206 ( $12\text{ mg Kg}^{-1}\text{ day}^{-1}$ , MK-2206) or a combination of MK-2206 and ouabain (Oua + MK). Heart rate was monitored with echocardiography at baseline, 24 hrs. and 3, 6 and 10 days post MI. Results are expressed as Means  $\pm$  SEM from 6 animals for each experimental group.
